# Supplementary material for: The Fabrication of a Probe-Integrated Electrochemiluminescence Aptasensor Based on Double-Layered Nanochannel Array with Opposite Charges for the Sensitive Determination of C-Reactive Protein
Source: MDPI journal article supplement (doi:10.3390/molecules28237867), 2023-11-30
Supplement: s1 [file s1]

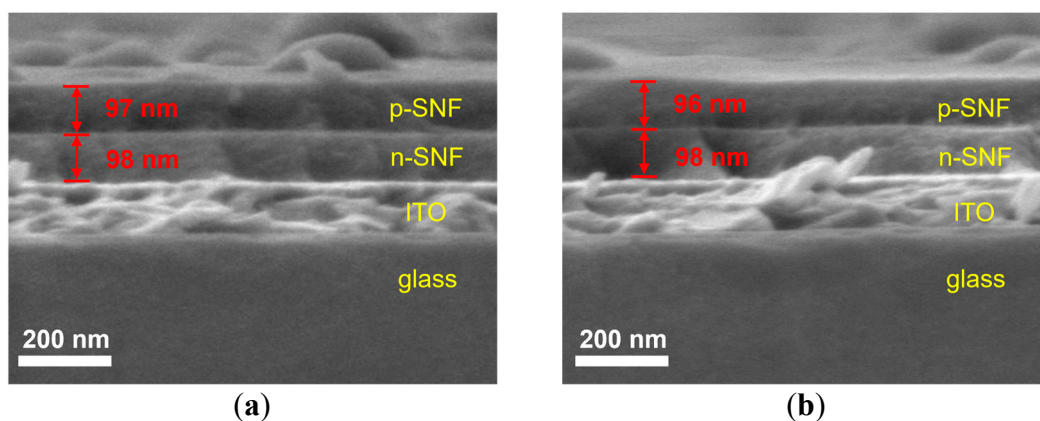

**Figure S1.** Cross-sectional SEM image of bp-SNF/ITO that have been stored for 11 days **(a)** or after contacted with the spiked serum **(b)**.
